# Supplementary material for: Porous Hybrid Nanofibers Comprising ZnSe/CoSe₂/Carbon with Uniformly Distributed Pores as Anodes for High-Performance Sodium-Ion Batteries
Source: PubMed Central journal article supplement (PMC6835312; doi:10.3390/nano9101362), 2019-09-23
Supplement: nanomaterials-09-01362-s001.pdf [file nanomaterials-09-01362-s001.pdf]

## **Supporting information**

# **Porous Hybrid Nanofibers Comprising ZnSe/CoSe<sub>2</sub>/Carbon with Uniformly Distributed Pores as Anodes for High-Performance Sodium-Ion Batteries**

**Sun Young Jeong and Jung Sang Cho \***

Department of Engineering Chemistry, Chungbuk National University, Chungbuk 361-763, Korea

\* Correspondence: jscho@cbnu.ac.kr; Tel.: +82-43-261-2489

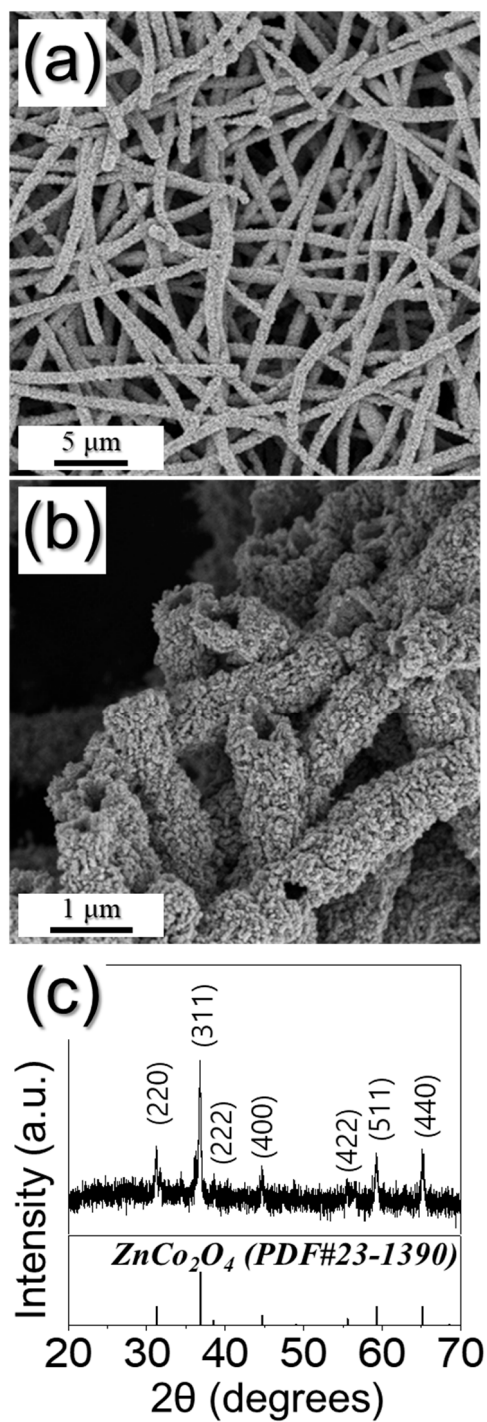

**Figure S1.** (a and b) Morphologies and (c) XRD pattern of the nanofibers obtained after heat-treatment of as-spun nanofiber at 400°C under air atmosphere.

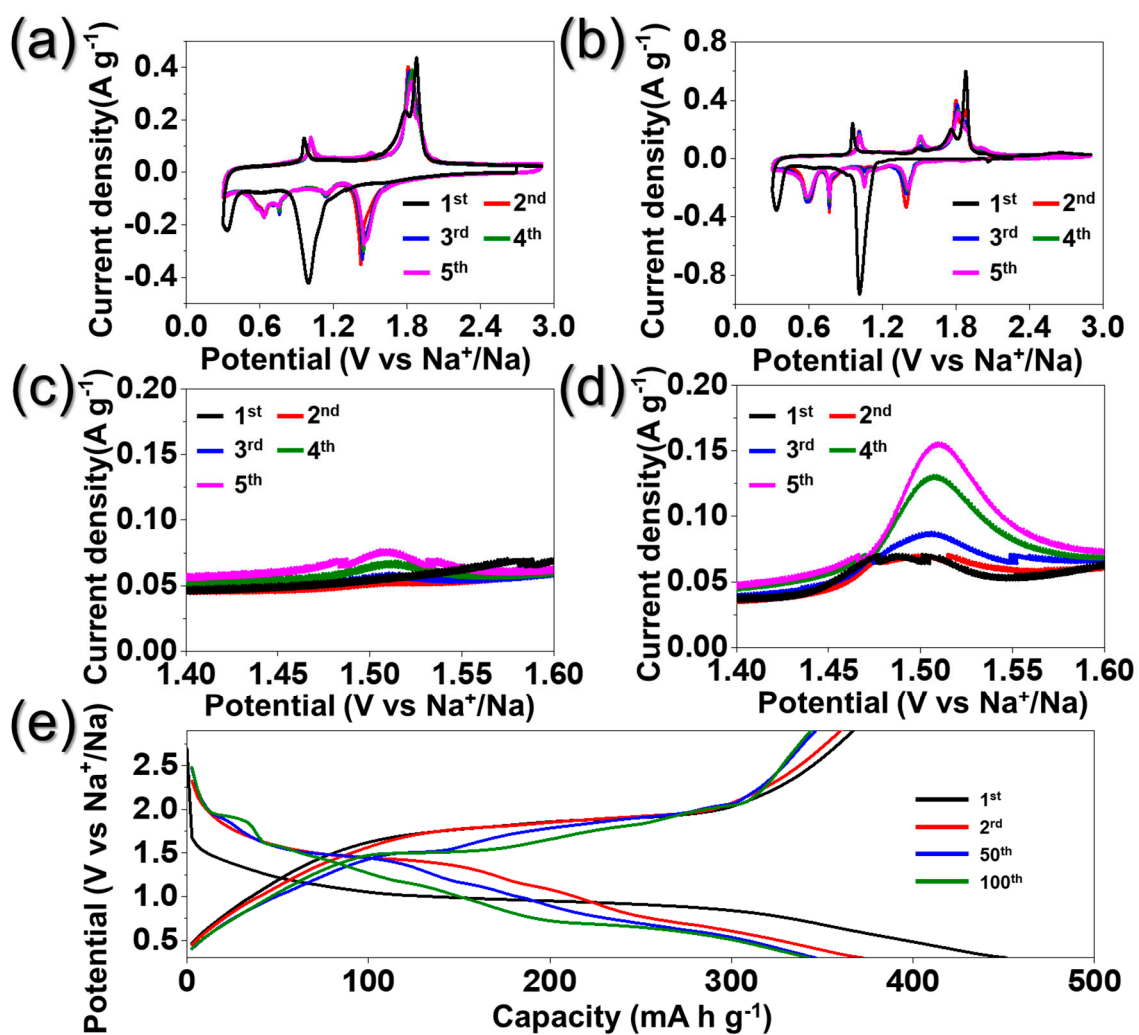

**Figure S2.** Electrochemical properties of porous ZnSe/CoSe<sub>2</sub>/C composite nanofibers and bare ZnSe/CoSe<sub>2</sub> powders: (a,c) cyclic voltammetry (CV) curves of porous ZnSe/CoSe<sub>2</sub>/C composite nanofibers, (b,d) CV curves of bare ZnSe/CoSe<sub>2</sub> powders, and (e) charge-discharge curves of porous ZnSe/CoSe<sub>2</sub>/C composite nanofibers. All cells assembled with ether-based electrolyte.

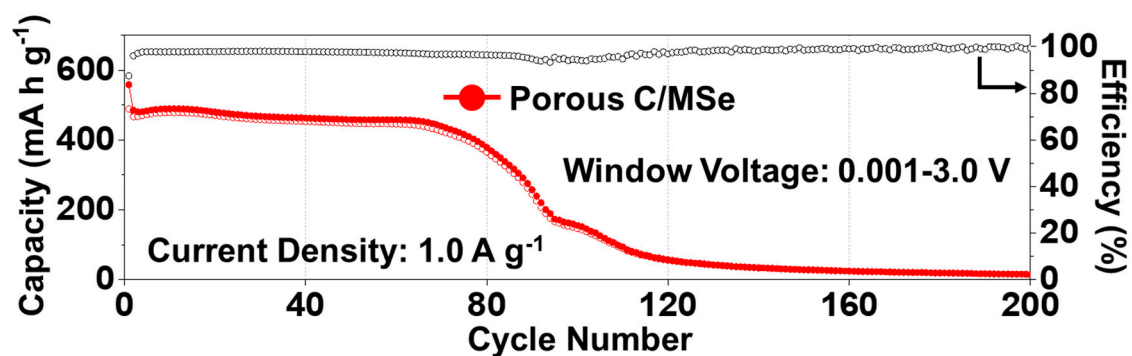

**Figure S3.** Cycling performance of the porous ZnSe/CoSe<sub>2</sub>/C composite nanofibers assembled with ether-based electrolyte in voltage windows between 0.001 and 3.0 V.

**Table S1.** Elemental analysis result of porous ZnSe/CoSe<sub>2</sub>/C composite nanofibers.

| Sample | C (wt%) |
|--------|---------|
| Sample | 15      |
